# Supplementary material for: MicroRNA-378 protects against intestinal ischemia/reperfusion injury via a mechanism involving the inhibition of intestinal mucosal cell apoptosis
Source: PubMed Central journal article supplement (PMC5682673; doi:10.1038/cddis.2017.508), 2017-10-12

## Supplementary Materials

### Supplementary Table 1:

Primers for real-time quantitative polymerase chain reaction.

| Gene    | Bidirectional primer sequence                                    |
|---------|------------------------------------------------------------------|
| U6      | F:5'GCTTCGGCAGCACATATACTAAAAT3'<br>R:5'CGCTTCACGAATTTGCGTGTCAT3' |
| miR-16  | F:5'GGGTAGCAGCACGTAAATA3'<br>R:5'CAGTGCGTGTCGTGGAGT3'            |
| mir-15b | F: 5'GGGGTAGCAGCACATCATG3'<br>R:5'GTGCGTGTCGTGGAGTCG 3'          |
| miR-378 | GSP:5'GGACACTGGACTTGGAG3'<br>R:5'TGCGTGTCGTGGAGTC3'              |
| miR-32  | F:5'GGGGCTATTGCACATTAATA3'<br>R:5'CAGTGCGTGTCGTGGAG3'            |
| miR-103 | F:5'GAGAGAGCAGCATTGTACAG3'<br>R:5'CAGTGCGTGTCGTGGA3'             |
| miR-182 | F:5'GCTTTGGCAATGGTAGAAC3'<br>R:5'CAGTGCGTGTCGTGGAG3'             |
| miR-192 | F:5'GGGCTGACCTATGAATTG3'<br>R:5'TGCGTGTCGTGGAGTC3'               |
| miR-26b | F:5'GGGGTTCAAGTAATTCAGG3'<br>R:5'TGCGTGTCGTGGAGTC3'              |
| let-7b  | F:5'GGGGTGAGGTAGTAGGTTG3'<br>R:5'TGCGTGTCGTGGAGTC3'              |
| 7a      | F:5'GGGGTGAGGTAGTAGGTTGT3'<br>R:5'CAGTGCGTGTCGTGGAGT3'           |

**Supplementary Figure 1:** Venn diagram analysis of MiRNA-378 predicted putative targets.

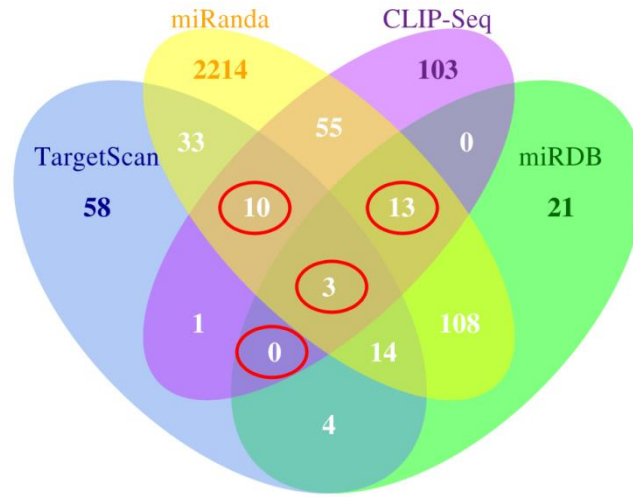

Supplement: cddis2017508x1.pdf [file cddis2017508x1.pdf]
